# Supplementary material for: Fluid Management, Intra-Abdominal Hypertension and the Abdominal Compartment Syndrome: A Narrative Review
Source: MDPI journal article supplement (doi:10.3390/life12091390), 2022-09-06
Supplement: s1 [file s1]

## Supplementary Tables

Table S1: Overview of included studies on burn

| Author patients           | Type of study | LOE | MINOR Score | Mean % TBSA                         | ISS | Definition of IAH: WSACS or other                                                                | Prevalence                      | % ACS mortality        | Correlation between IAP and IV fluid                 |
|---------------------------|---------------|-----|-------------|-------------------------------------|-----|--------------------------------------------------------------------------------------------------|---------------------------------|------------------------|------------------------------------------------------|
| Ivy et al. [19]           | Prospective   | 3   | 12          | 46 (22-80)                          |     | IAH = IAP > 25mmHg;<br>ACS = ↓pulmonary compliance + persistent IAH + treatment of decompression | 70% IAH<br>20% ACS              | 20                     | r <sup>2</sup> =0.121                                |
| O'Mara et al. [23]        | RCT           | 3   | 19          | C: 50.1 ± 12.4<br>P: 52.1 ± 12.4    |     | IAH= IAP > 25mmHg;<br>ACS = IAP + renal or pulmonary compromise                                  |                                 | C: 26.6<br>P: 18.75    | C: r <sup>2</sup> =0.352<br>P: r <sup>2</sup> =0.657 |
| Oda et al. [21]           | Observational | 3   | 18          | HLS: 66.7 ± 20.1<br>LR: 64.2 ± 20.4 |     | IAH = IAP> 22mmHg;<br>ACS = IAH + tense abdomen + high PIP or oliguria                           | HLS: 14% IAH<br>LR: 50% IAH     | 30.5                   |                                                      |
| Oda et al. [22]           | Observational | 3   | 12          | 45.9 ± 21.8                         |     | IAH = IAP> 22 mmHg;<br>ACS = IAH + tense abdomen = high PIP or oliguria                          | 16.6% ACS                       |                        |                                                      |
| Ennis et al. [18]         | Prospective   | 3   | 19          | BRG: 52 ± 17<br>control: 50 ± 17    |     | ACS = IAH >20mmHg + MOF requiring DL                                                             | BRG: 5% ACS<br>Control: 16% ACS | BRG: 18<br>Control: 31 | % TBSA ~ ACS:<br>OR, 1.052; CI, 1.009-1.097; p=0.018 |
| Ruiz-Castilla et al. [24] | Observational | 3   | 12          | 33 (25-58)                          |     | WSACS                                                                                            | IAH: 72%<br>ACS: 4%             | 38.9                   |                                                      |
| Wise et al. [26]          | Observational | 3   | 12          | 24.9 ± 24.9                         |     | WSACS                                                                                            | IAH: 78.6%<br>ACS: 28.6%        | 62.5                   |                                                      |
| Mbiine et al. [20]        | Observational | 3   | 13          | 43.2 ± 20.2                         |     | WSACS                                                                                            | IAH: 57.8%                      | 82.6                   | RR 1.04 (0.61-1.79)                                  |
| Talizin et al. [25]       | Prospective   | 3   | 12          | Median: 30.5                        |     | WSACS                                                                                            | IAH: 82.6%                      | 63.2                   | r=0.29                                               |
| Boehm et al. [27]         | Retrospective | 3   | 10          | ACS-group:<br>50 ± 22;              |     | WSACS                                                                                            |                                 | ACS: 84<br>Control: 32 |                                                      |

|                         |               |   |    |                                                     |           |                                                                |                                      |                            |  |
|-------------------------|---------------|---|----|-----------------------------------------------------|-----------|----------------------------------------------------------------|--------------------------------------|----------------------------|--|
|                         |               |   |    | Control group:<br>49 ± 21                           |           |                                                                |                                      |                            |  |
| Hershberger et al. [28] | Retrospective | 3 | 10 | 65 ± 19                                             |           | WSACS                                                          |                                      | 88                         |  |
| Hobsen et al. [29]      | Retrospective | 3 | 10 | Adult: 75<br>Pediatric:68                           |           | WSACS                                                          |                                      | Adult: 75<br>Pediatric: 50 |  |
| Markell et al. [30]     | Retrospective | 3 | 10 | 48 ±19                                              | 36 ± 15   | ACS = IAP > 30 mmHg +<br>urine output <30 mL/h                 | ACS: 26.7%                           | 90                         |  |
| McBeth et al. [31]      | Retrospective | 3 | 9  | 31.4 ± 20.9                                         | 21.8 ±8.3 | WSACS                                                          | ACS: 80%                             |                            |  |
| Park et al. [32]        | Retrospective | 3 | 10 | Pre-protocol:<br>39 ± 18<br>Postprotocol<br>38 ± 18 |           |                                                                | Pre-protocol:10%<br>Postprotocol: 3% |                            |  |
| Ivy et al. [33]         | Case series   | 5 |    | > 70                                                |           | IAP > 25 mmHg + oliguria,<br>decreased pulmonary<br>compliance | 100%                                 | 100                        |  |
| Streit et al. [35]      | Case report   | 6 |    | 80                                                  |           | WSACS                                                          |                                      |                            |  |
| Sun et al. [36]         | Case report   | 6 |    | 70                                                  |           | WSACS                                                          |                                      |                            |  |

MINORS: Methodological items for non-randomized studies Score; LOE: level of evidence; TBSA: total body surface area; WSACS: World Society of the Abdominal Compartment Syndrome; ACS: abdominal compartment syndrome; IV: intravenous; IAH: intra-abdominal hypertension; HES: hydroxyethyl starch; LR: lactated Ringer solution; BRG: burn resuscitation guidelines; C: crystalloid; P: plasma; ISS: injury severity score

Table S2: Overview of included studies on SAP patients

| Author           | Type of study | LOE | MINOR Score | Definition of IAH:<br>WSACS or other | Prevalence                                                   | % ACS mortality                                         | Correlation between IAP<br>and IV fluid |
|------------------|---------------|-----|-------------|--------------------------------------|--------------------------------------------------------------|---------------------------------------------------------|-----------------------------------------|
| Mao et al. [43]  | RCT           | 2   | 20          | other                                | Rapid fluid group: 72.2%;<br>Controlled fluid group: 32.5%   | Rapid fluid group: 30.6;<br>Controlled fluid group: 10% |                                         |
| Du et al. [41]   | RCT           | 2   | 20          | WSACS                                | HES: 0% IAH<br>LR: 33% IAH                                   | HES: 5%<br>RL: 2%                                       |                                         |
| Ke et al. [42]   | Observational | 3   | 19          | WSACS                                | IAH: 62%<br>ACS: 12%                                         | 16.7%                                                   | OR: 1.003 (1.001-1.006)                 |
| Zhao et al. [40] | RCT           | 2   | 20          | WSACS                                | IAH:<br>NS group: 15%<br>SH group: 27.5%<br>SHG group: 27.5% | NS group: 12.5%<br>SH group: 5%<br>SHG group: 7.5%      |                                         |
| Lee et al. [45]  | Case report   | 6   |             |                                      |                                                              |                                                         |                                         |
| Park et al. [46] | Case report   | 6   |             |                                      |                                                              |                                                         |                                         |

LOE: level of evidence; SAP: severe acute pancreatitis; HES: hydroxyethyl starch; NS group: normal saline; SH group: combination of normal saline and hydroxyethyl starch (HES); SHG group: combination of normal saline, hydroxyethyl starch and glutamine

Table S3: Overview of included studies on trauma patients

| Author                | Type of study             | LOE | MINOR Score | Population type | ISS                                             | Definition of IAH: WSACS or other                | Prevalence                                                            | % ACS mortality                     | Correlation between IAP and IV fluid                                                                      |
|-----------------------|---------------------------|-----|-------------|-----------------|-------------------------------------------------|--------------------------------------------------|-----------------------------------------------------------------------|-------------------------------------|-----------------------------------------------------------------------------------------------------------|
| Raeburn et al. [51]   | Observational             | 3   | 12          | Trauma          | ACS: 32 $\pm$ 3;<br>No ACS 27 $\pm$ 2           | ACS: IAH>20 mmHg + renal or pulmonary compromise | ACS: 36%                                                              | 43%                                 |                                                                                                           |
| Balogh et al. [47]    | Prospective               | 3   | 18          | Trauma          | 28 $\pm$ 3                                      | ACS = IAH>25 mmHg + renal dysfunction            | ACS: 9%                                                               | 5%                                  |                                                                                                           |
| Balogh et al. [48]    | Observational             | 3   | 18          | Trauma          | SN group: 28 $\pm$ 3;<br>N group: 27 $\pm$ 2    | WSACS                                            | SN group: IAH:49.4%<br>ACS:18.8%;<br>N group: IAH: 28.2%<br>ACS 11.3% | SN group: 31.2%;<br>N: group: 15.5% |                                                                                                           |
| Cotton et al. [74]    | Prospective               | 3   | 17          | Trauma          | Pre-TEP: 28 $\pm$ 15.5;<br>TEP: 33.3 $\pm$ 15.9 | WSACS                                            | ACS: Pre-TEP: 9.9%<br>TEP: 0                                          | Pre-TEP: 62.4;<br>TEP: 43.2         | OR for TEP and MOF: 0.2 (0.106-0.395)                                                                     |
| Neal et al. [50]      | Multi-centre, Prospective | 3   | 16          | Trauma          | Median 34                                       |                                                  |                                                                       | 15.1%                               | C:RCC ratio > 1.5:1<br>OR: 6.2 (1.1-36)                                                                   |
| Mahmood et al. [49]   | Observational             | 3   | 21          | Trauma          | 23 $\pm$ 10                                     | WSACS                                            | IAH: 74.5%<br>ACS: 0.9%                                               | 0.9%                                | Blood transfused<br>OR:1.11 (1.01-1.22);<br>FFP<br>OR: 1.12 (1.0-1.24);<br>Fluid:<br>OR: 1.15 (0.97-1.36) |
| Vatankhan et al. [52] | Observational             | 3   | 12          | Trauma          |                                                 | WSACS                                            | ACS: 28%                                                              | 75%                                 |                                                                                                           |
| Gracias et al. [54]   | Retrospective             | 3   | 9           | Trauma          |                                                 | WSACS                                            |                                                                       | 60                                  |                                                                                                           |

|                       |               |   |    |        |                                                         |                             |                                                             |         |                                                                                      |
|-----------------------|---------------|---|----|--------|---------------------------------------------------------|-----------------------------|-------------------------------------------------------------|---------|--------------------------------------------------------------------------------------|
| Balogh et al. [53]    | Retrospective | 3 | 10 | Trauma | SN: $28 \pm 3$ ;<br>N: $27 \pm 2$                       | WSACS                       | SN:<br>IAH: 49%<br>ACS: 18.8%<br>N:<br>IAH: 28%<br>ACS: 11% |         |                                                                                      |
| He et al. [55]        | Retrospective | 3 | 10 | Trauma | $23.1 \pm 7.4$                                          |                             | IAH: 9.7%<br>ACS: 1.1%                                      | 40      |                                                                                      |
| Hwabejire et al. [56] | Retrospective | 3 | 12 | Trauma | ACS: $37 \pm 14$<br>No-ACS:<br>$32 \pm 14$              | WSACS                       | ACS: 6.2%                                                   | 37.7    | OR: 1.003 (1.002-1.004)                                                              |
| Joseph et al. [57]    | Retrospective | 3 | 12 | Trauma |                                                         | WSACS                       | ACS: 2.2%                                                   | 55.6%   | OR: 1.07 (1.01-1.1)                                                                  |
| Macedo et al. [58]    | Retrospective | 3 | 10 | Trauma | $21.9 \pm 14.3$                                         | WSACS                       |                                                             | 60%     |                                                                                      |
| Shaheen et al. [62]   | Retrospective | 3 | 10 | Trauma | $22.5 \pm 15.3$                                         | WSACS                       |                                                             | 32.14%. |                                                                                      |
| Madigan et al. [59]   | Retrospective | 3 | 12 | Trauma | ACS:<br>$25.6 \pm 9.06$<br>control:<br>$21.4 \pm 11.02$ | IAH >25mmHg + organ failure |                                                             | 60%     | Prehospital fluid:<br>OR: 1.99 (1.07-3.73)<br>ED crystalloid<br>OR: 1.85 (1.08-3.15) |
| Maxwell et al. [60]   | Retrospective | 3 |    | Trauma | ISS $25 \pm 3$                                          |                             | 4% ACS                                                      |         |                                                                                      |
| Rodas et al. [61]     | Retrospective | 3 | 9  | Trauma |                                                         | WSACS                       | ACS: 0.13%                                                  | 0%      |                                                                                      |
| Strang et al. [75]    | Retrospective | 3 | 12 | Trauma | 21 (13-34)                                              | WSACS                       | IAH: 10.2%<br>ACS: 51.7%                                    | 25.9%   | OR: 1.17-1.21                                                                        |
| Zaydfudim et al. [69] | Retrospective | 3 | 12 | Trauma | Pre-TEP:<br>$28 \pm 15$ ;<br>TEP:<br>$41 \pm 18$        |                             | Pre-TEP: 20%<br>TEP: 0%                                     |         |                                                                                      |

|                       |             |   |  |                    |  |  |  |       |  |
|-----------------------|-------------|---|--|--------------------|--|--|--|-------|--|
| Kopelman et al. [65]  | Case series | 5 |  | Trauma             |  |  |  | 66.7% |  |
| Kula et al. [72]      | Case series | 5 |  | Trauma             |  |  |  |       |  |
| Chamisa et al. [64]   | Case report | 6 |  | Trauma             |  |  |  |       |  |
| Michel et al. [66]    | Case report | 6 |  | Trauma             |  |  |  |       |  |
| Kobayashi et al. [71] | Case report | 6 |  | Trauma             |  |  |  |       |  |
| Perks et al. [68]     | Case report | 6 |  | Trauma             |  |  |  |       |  |
| Morell et al. [67]    | Case report | 6 |  | Trauma             |  |  |  |       |  |
| Burrows et al. [63]   | Case series | 5 |  | Trauma/<br>Surgery |  |  |  |       |  |
| Parra et al. [34]     | Case report | 6 |  | Burn/<br>Trauma    |  |  |  |       |  |
| DeCou et al. [70]     | Case series | 5 |  | Trauma/<br>sepsis  |  |  |  |       |  |
| Jensen et al. [37]    | Case series | 5 |  | Burn/<br>Trauma    |  |  |  |       |  |

Table S4: Overview of included studies on medical and surgical patients

| Author                       | Type of study | LOE | MINOR Score | Population type | Definition of IAH: WSACS or other | Prevalence                      | % ACS mortality | Correlation between IAP and IV fluid            |
|------------------------------|---------------|-----|-------------|-----------------|-----------------------------------|---------------------------------|-----------------|-------------------------------------------------|
| Divarci et al. [81]          | Prospective   | 3   | 12          | Medical         | WSACS                             | IAH: 9%<br>ACS: 4%              | 16%             |                                                 |
| Ranjit et al. [84]           | Prospective   | 3   | 16          | Medical         | NR                                | ST-group: 30%<br>TI-group: 7.9% |                 |                                                 |
| Daugherty et al. [86]        | Observational | 3   | 12          | Medical         | WSACS                             | IAH: 85%<br>ACS: 25%            | 80%             |                                                 |
| Cordemans et al. [78]        | Observational | 3   | 11          | Medical         | WSACS                             | IAH: 20%                        |                 |                                                 |
| Dorigatti et al. [85]        | Observational | 3   | 12          | Medical         | WSACS                             | IAH: 68%<br>ACS: 28%            | 71.42%          |                                                 |
| Cordemans et al. [87]        | Retrospective | 3   | 10          | Medical         | WSACS                             |                                 |                 |                                                 |
| Pupelis et al. [44]          | Retrospectiv  | 3   | 10          | Medical         | WSACS                             | IAH: 68.5%                      | 12.4%           |                                                 |
| Struck et al. [79]           | Retrospective | 3   | 10          | Medical         | WSACS                             | ACS: 17.2%                      | 100%            |                                                 |
| Kula et al. [73]             | Case series   | 5   |             | Medical         |                                   |                                 |                 |                                                 |
| Macalino et al. [77]         | Case report   | 6   |             | Medical         |                                   |                                 |                 |                                                 |
| Tsuang et al. [76]           | Case report   | 6   |             | Medical         |                                   |                                 |                 |                                                 |
| Dauplaise et al. [80]        | Case report   | 6   |             | Medical         |                                   |                                 |                 |                                                 |
| Gala et al. [82]             | Case report   | 6   |             | Medical         |                                   |                                 |                 |                                                 |
| Biancofiore et al. [92]      | Observational | 3   | 13          | Surgical        |                                   | IAH: 32%                        | 14.7%           |                                                 |
| Šerpytis et al. [97]         | Observational | 3   | 12          | Surgical        | WSACS                             | IAH: 45.5%                      |                 | POD1: r=0.492<br>POD2: r=0.518<br>POD3: r=0.405 |
| Makar et al. [95]            | Prospective   | 3   | 18          | Surgical        |                                   | ACS: 6.7%                       | 6.7%            | r=0.43                                          |
| Dalfino et al. [93]          | Observational | 3   | 14          | Surgical        | WSACS                             | IAH: 31.8%                      |                 | OR 4.31 (1.68-5.54)                             |
| Muturi et al. [96]           | Observational | 3   | 13          | Surgical        | WSACS                             | IAH: 60.5%<br>ACS: 20%          |                 | OR 1 (1.0-1.002)                                |
| Kotlińska-Hasiec et al. [94] | Observational | 3   | 20          | Surgical        | NR                                |                                 |                 | r=0.57                                          |

|                        |                   |   |    |                  |       |                          |                                      |                         |
|------------------------|-------------------|---|----|------------------|-------|--------------------------|--------------------------------------|-------------------------|
| McNelis et al. [99]    | Retrospective     | 3 | 10 | Surgical         | NR    |                          | 66.7%                                | $P=1/(1+e^{-z})$        |
| Rubenstein et al. [89] | Retrospective     | 3 | 10 | Surgical         | NR    | ACS: 29%                 | 66.7%                                |                         |
| Leclerc et al. [98]    | Retrospective     | 3 | 10 | Surgical         | WSACS | ACS :17%                 | 37.5%                                |                         |
| Miranda et al. [88]    | Retrospective     | 3 | 10 | Surgical         | WSACS | ACS: 12%                 | 67%                                  |                         |
| Fietsam et al. [101]   | Case report       | 6 |    | Surgery          |       |                          |                                      |                         |
| De Wolf et al. [100]   | Case report       | 6 |    | Surgery          |       |                          |                                      |                         |
| Bressan et al. [91]    | Case report       | 6 |    | Surgery          |       |                          |                                      |                         |
| Rabbi et al. [102]     | Case report       | 6 |    | Surgery          |       |                          |                                      |                         |
| Shiyya et al. [103]    | Case report       | 6 |    | Surgery          |       |                          |                                      |                         |
| Biffl et al. [104]     | Prospective       | 3 | 10 | Medical-surgical | WSACS |                          | 38% in trauma;<br>100% in non-trauma |                         |
| Malbrain et al. [110]  | Observational     | 3 | 12 | Medical-surgical | WSACS | IAH: 58.8%<br>ACS: 8.2%  |                                      |                         |
| Malbrain et al. [109]  | Observational     | 3 | 14 | Medical-surgical | WSACS | IAH: 32.1%<br>ACS: 4.2%  | 27.5%                                |                         |
| Dalfino et al. [107]   | Observational     | 3 | 14 | Medical-surgical | WSACS | IAH: 30.1%               | 54%                                  | OR:5.22 (2.03-7.45)     |
| Vidal et al. [113]     | Prospective       | 3 | 14 | Medical-surgical | WSACS | IAH 64%<br>ACS 6%        | 100%                                 | RR 2.5 (0.91-6.9)       |
| Blaser et al. [116]    | Observational     | 3 | 14 | Medical-surgical | WSACS | IAH 32.3%<br>ACS 6%      |                                      |                         |
| Kim et al. [114]       | Observational     | 3 | 14 | Medical-surgical | WSACS | IAH 42%<br>ACS 2%        | 0%                                   | $r^2$ :0.48             |
| Iyer et al. [111]      | Observational     | 3 | 13 | Medical-surgical | WSACS | IAH: 39%<br>ACS: 2%      |                                      | OR: 2.678 (1.48-4.84)   |
| Malbrain et al. [115]  | Systematic review | 1 |    | Medical-surgical |       |                          |                                      |                         |
| Dąbrowski et al. [5]   | Observational     | 3 | 11 | Medical-surgical | WSACS | IAH: 28%                 |                                      |                         |
| Murphy et al. [108]    | Observational     | 3 | 14 | Medical-surgical | WSACS | IAH: 45%<br>ACS 2.8%     | 87.5%                                | OR 2.45 (1.18-5.14)     |
| Blaser et al. [112]    | Observational     | 3 | 14 | Medical-surgical | WSACS | IAH: 48.9%<br>ACS : 6.3% | 67.7%                                | OR: 1.168 (1.068-1.278) |
| Aik-Yong et al. [105]  | Retrospectivte    | 3 | 10 | Medical-surgical | WSACS | ACS: 0.1%                | 47.1%                                |                         |



|                      |                |   |    |                  |       |  |       |  |
|----------------------|----------------|---|----|------------------|-------|--|-------|--|
| Cothren et al. [106] | Retrospective  | 3 | 10 | Medical-surgical | WSACS |  | 38.9% |  |
| Britt et al. [38]    | Retrospectivve | 3 | 9  | Trauma-burn      | NR    |  | 60%   |  |
| Reed et al. [39]     | Retrospective  | 3 | 10 | Trauma-burn      | NR    |  |       |  |

ED: emergency department, ST group: standard therapy; TI group: targeted intervention;  $z = -18,6763 + 0,1671$  (peak airway pressure) +  $0,0009$  (fluid balance)
